# Supplementary material for: Supramolecular biomaterials as drug nanocontainers with iron depletion properties for antimicrobial applications
Source: Royal Society of Chemistry journal article supplement (doi:10.1039/d3ma00918a), 2024-01-01
Supplement: d3ma00918a1.pdf [file d3ma00918a1.pdf]

## Supramolecular biomaterial as drug nano-container with iron depletion properties for antimicrobial applications

Chiara Zagni,<sup>a</sup> Vincenzo Patamia,<sup>a</sup> Sandro Dattilo,<sup>b</sup> Virginia Fuochi,<sup>c</sup> Salvatore Furnari,<sup>c</sup> Pio Maria Furneri,<sup>c</sup> Sabrina Carola Carroccio,<sup>b</sup> Giuseppe Floresta\*<sup>a</sup> and Antonio Rescifina<sup>a</sup>

<sup>a</sup>Department of Drug and Health Sciences, University of Catania, V.le A. Doria 6, 95125, Catania, Italy.

<sup>b</sup>Institute for Polymers, Composites, and Biomaterials CNR-IPCB, Via Paolo Gaifami 18, 95126, Catania, Italy.

<sup>c</sup> Department of Biomedical and Biotechnological Sciences (Biometec). University of Catania. Via S. Sofia 89, 95125, Catania, Italy.

### Table of Contents

|                                                                                                            |   |
|------------------------------------------------------------------------------------------------------------|---|
| <b>Fig. S1</b> a) SEM micrographs of $\beta$ -CD/HEMA/Malt cryogel; b) graph of porosimetric distribution. | 2 |
| <b>Fig. S2</b> Swelling ratio and thermogravimetric analysis of the $\beta$ -CD/HEMA/Malt cryogel.         | 2 |
| <b>Fig. S3</b> Stacked IR spectra of <b>6</b> (black line), <b>7</b> (red line), and <b>8</b> (blue line). | 2 |
| <b>Fig. S4</b> Lomefloxacin titration curve obtained by UV spectroscopy.                                   | 3 |
| <b>Fig. S5</b> <sup>1</sup> H NMR of compound <b>6</b> .                                                   | 3 |
| <b>Fig. S6</b> <sup>13</sup> C NMR of compound <b>6</b> .                                                  | 4 |
| <b>Fig. S7</b> Kinetic release fitting from $\beta$ -CD/HEMA/Malt cryogel ( <b>8</b> ).                    | 4 |

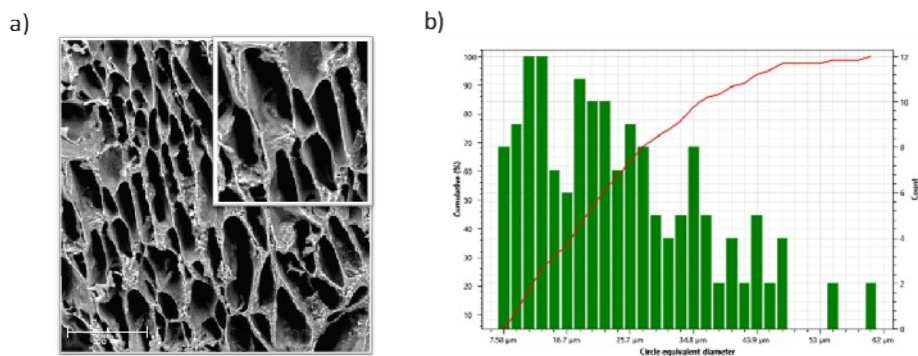

**Fig. S1** a) SEM micrographs of  $\beta$ -CD/HEMA/Malt cryogel; b) graph of porosity distribution.

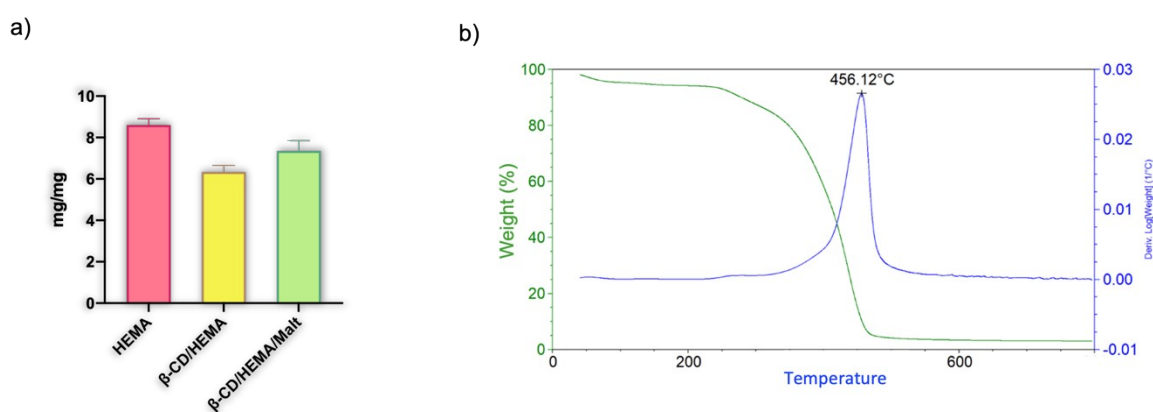

**Fig. S2** a) Swelling ratio of HEMA,  $\beta$ -CD /HEMA, and  $\beta$ -CD /HEMA/Malt cryogels; b) thermogravimetric analysis of  $\beta$ -CD/HEMA/Malt cryogel.

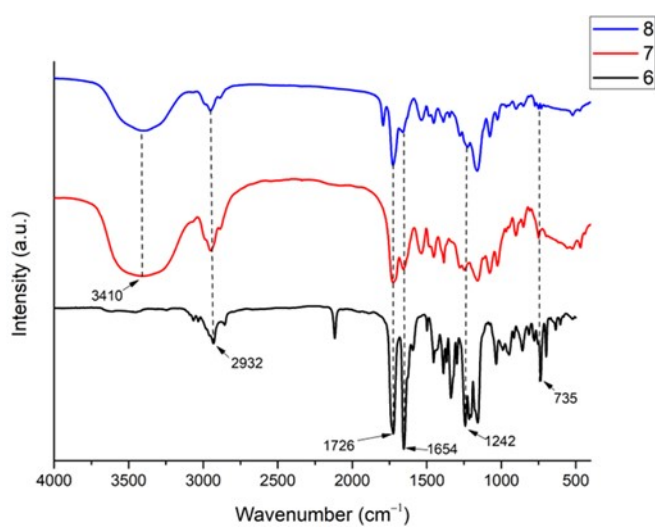

**Fig. S3** Stacked IR spectra of **6** (black line), **7** (red line), and **8** (blue line).

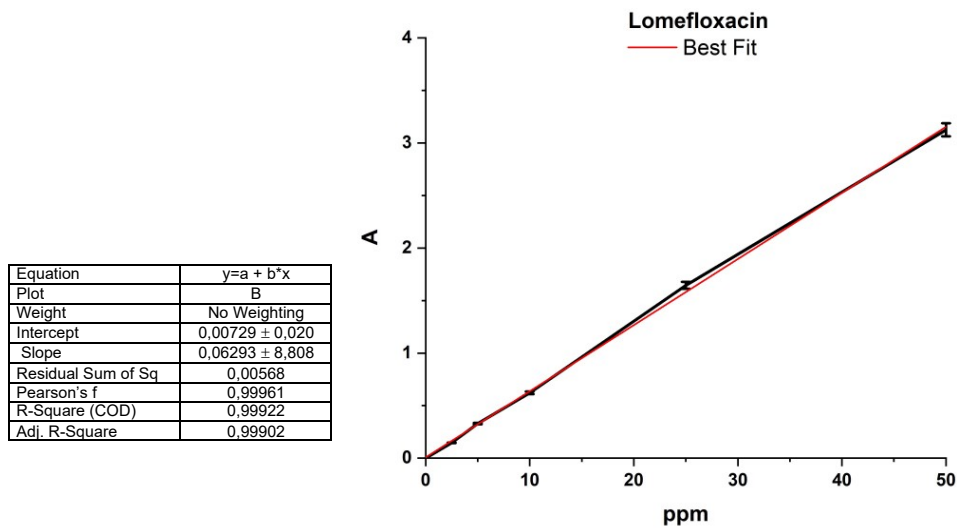

Fig. S4 Lomefloxacin titration curve obtained by UV spectroscopy.

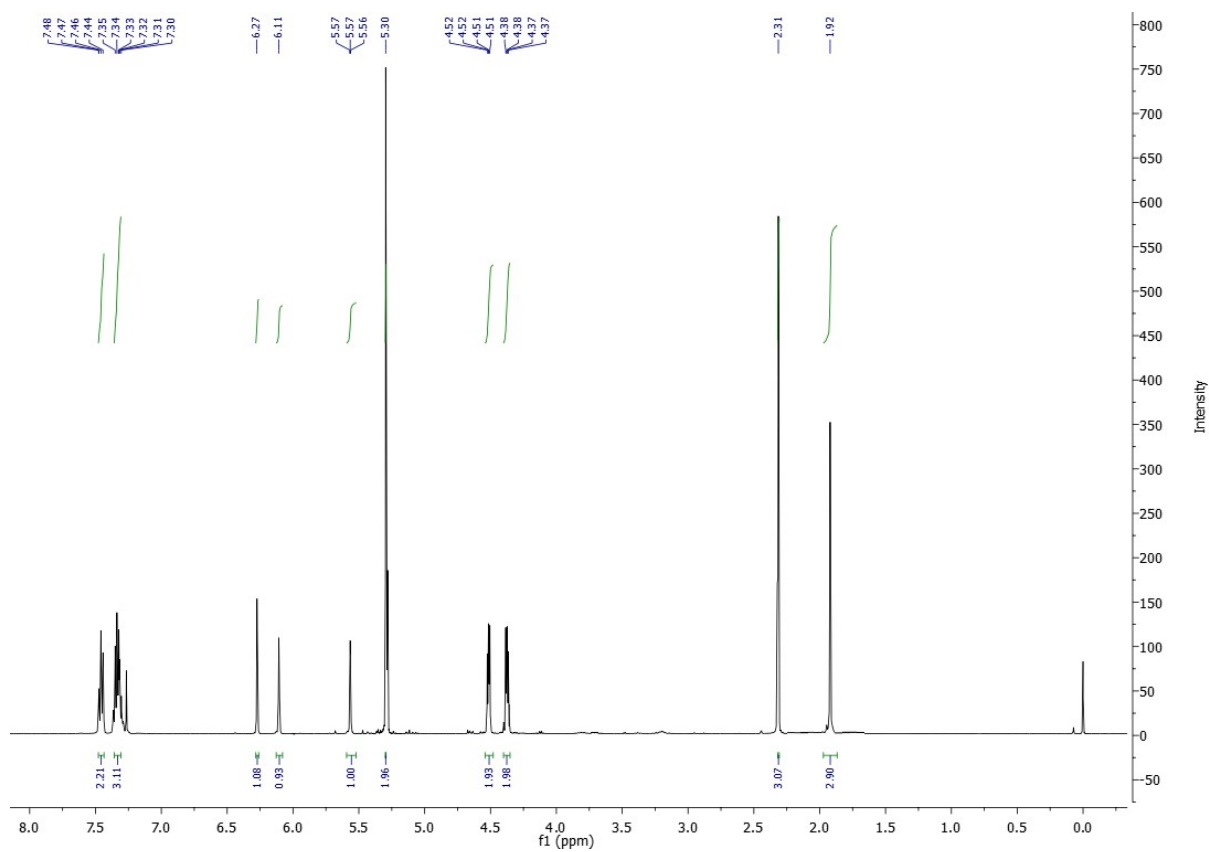

Fig. S5  $^1\text{H}$  NMR of compound 6.

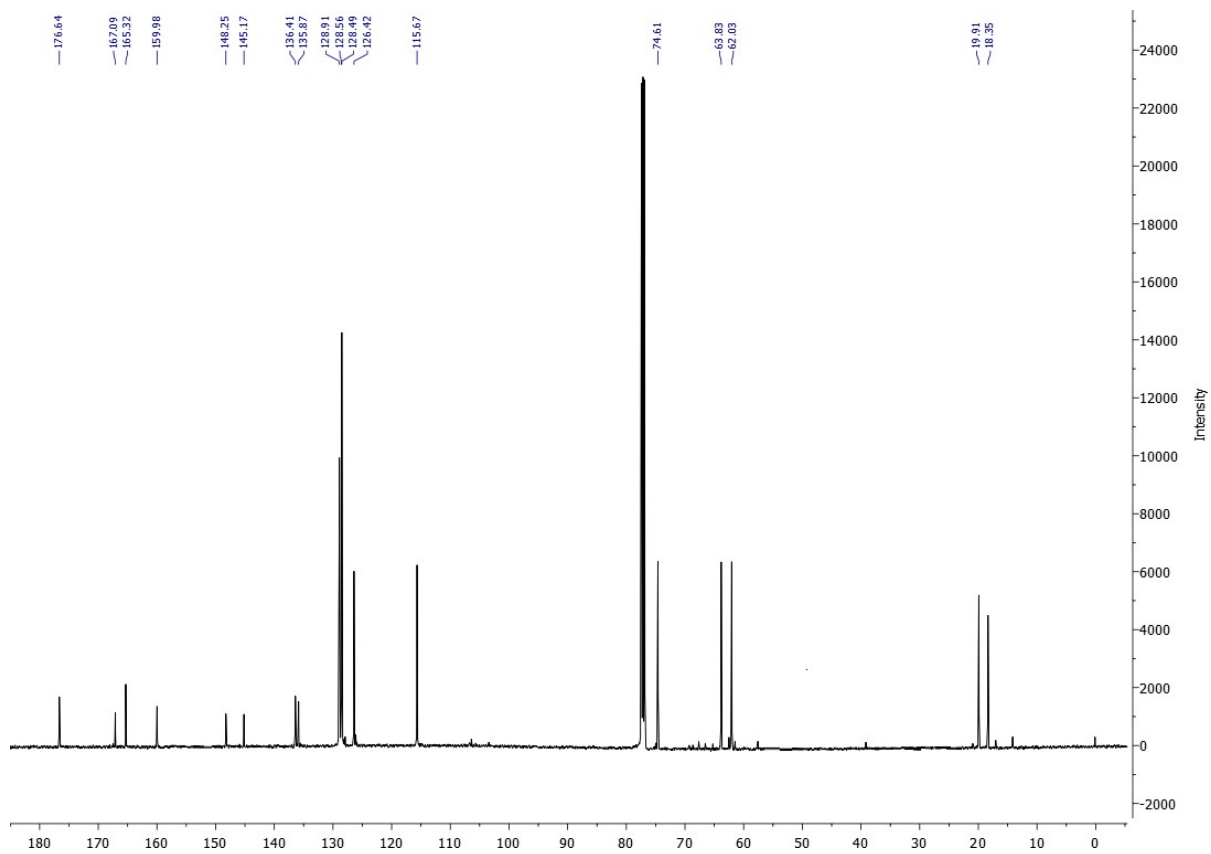

Fig. S6  $^{13}\text{C}$  NMR of compound **6**.

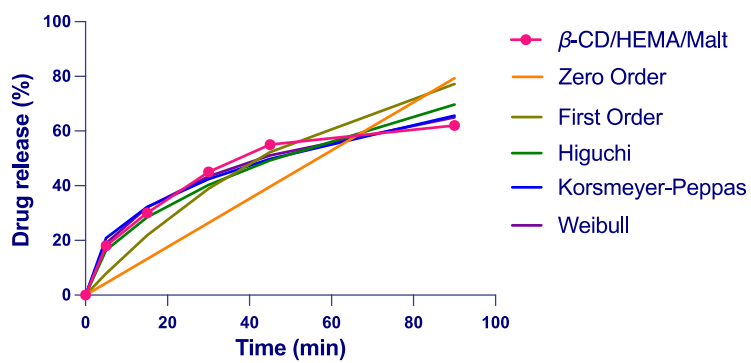

Fig. S7 Kinetic release fitting from  $\beta$ -CD/HEMA/Malt cryogel (**8**).
